# Supplementary material for: Differential Gene Expression in Circulating CD14+ Monocytes Indicates the Prognosis of Critically Ill Patients with Sepsis
Source: PubMed Central journal article supplement (PMC7019484; doi:10.3390/jcm9010127), 2020-01-02
Supplement: jcm-09-00127-s001.pdf [file jcm-09-00127-s001.pdf]

# Supplementary Material

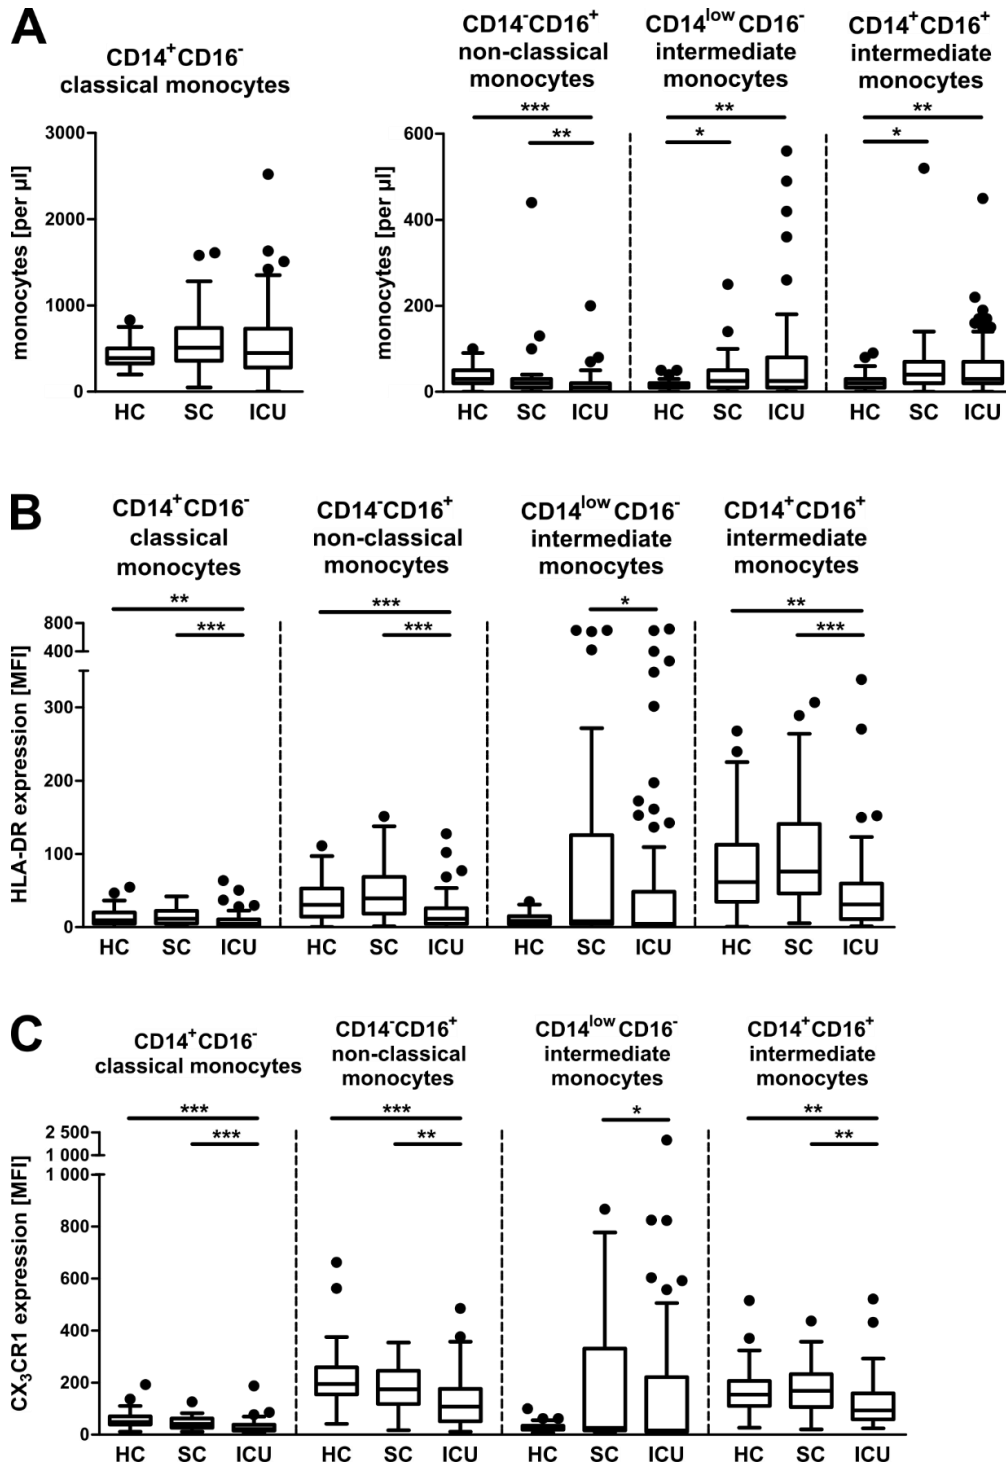

**Supplementary Figure S1.** Monocyte subsets in healthy volunteers, standard care patients with infection, and intensive care patients. (A) Absolute numbers of monocyte subpopulations from the different patient cohorts from HC, SC and ICU. (B) and (C) Mean fluorescence intensity (MFI) of HLA-DR (B) and CX<sub>3</sub>CR1 (C) expression of the monocyte subpopulations in HC, SC and ICU patients. Statistics: \* indicates  $p < 0.05$ , \*\*  $p < 0.01$ , \*\*\*  $p < 0.001$ . For comparison of more than two groups the Kruskal–Wallis test was performed followed by a post hoc test by Dunn’s multiple comparison test. Sample sizes: healthy controls (HC)  $n = 54$ , standard care (SC)  $n = 42$ , intensive care unit (ICU)  $n \geq 75$ .

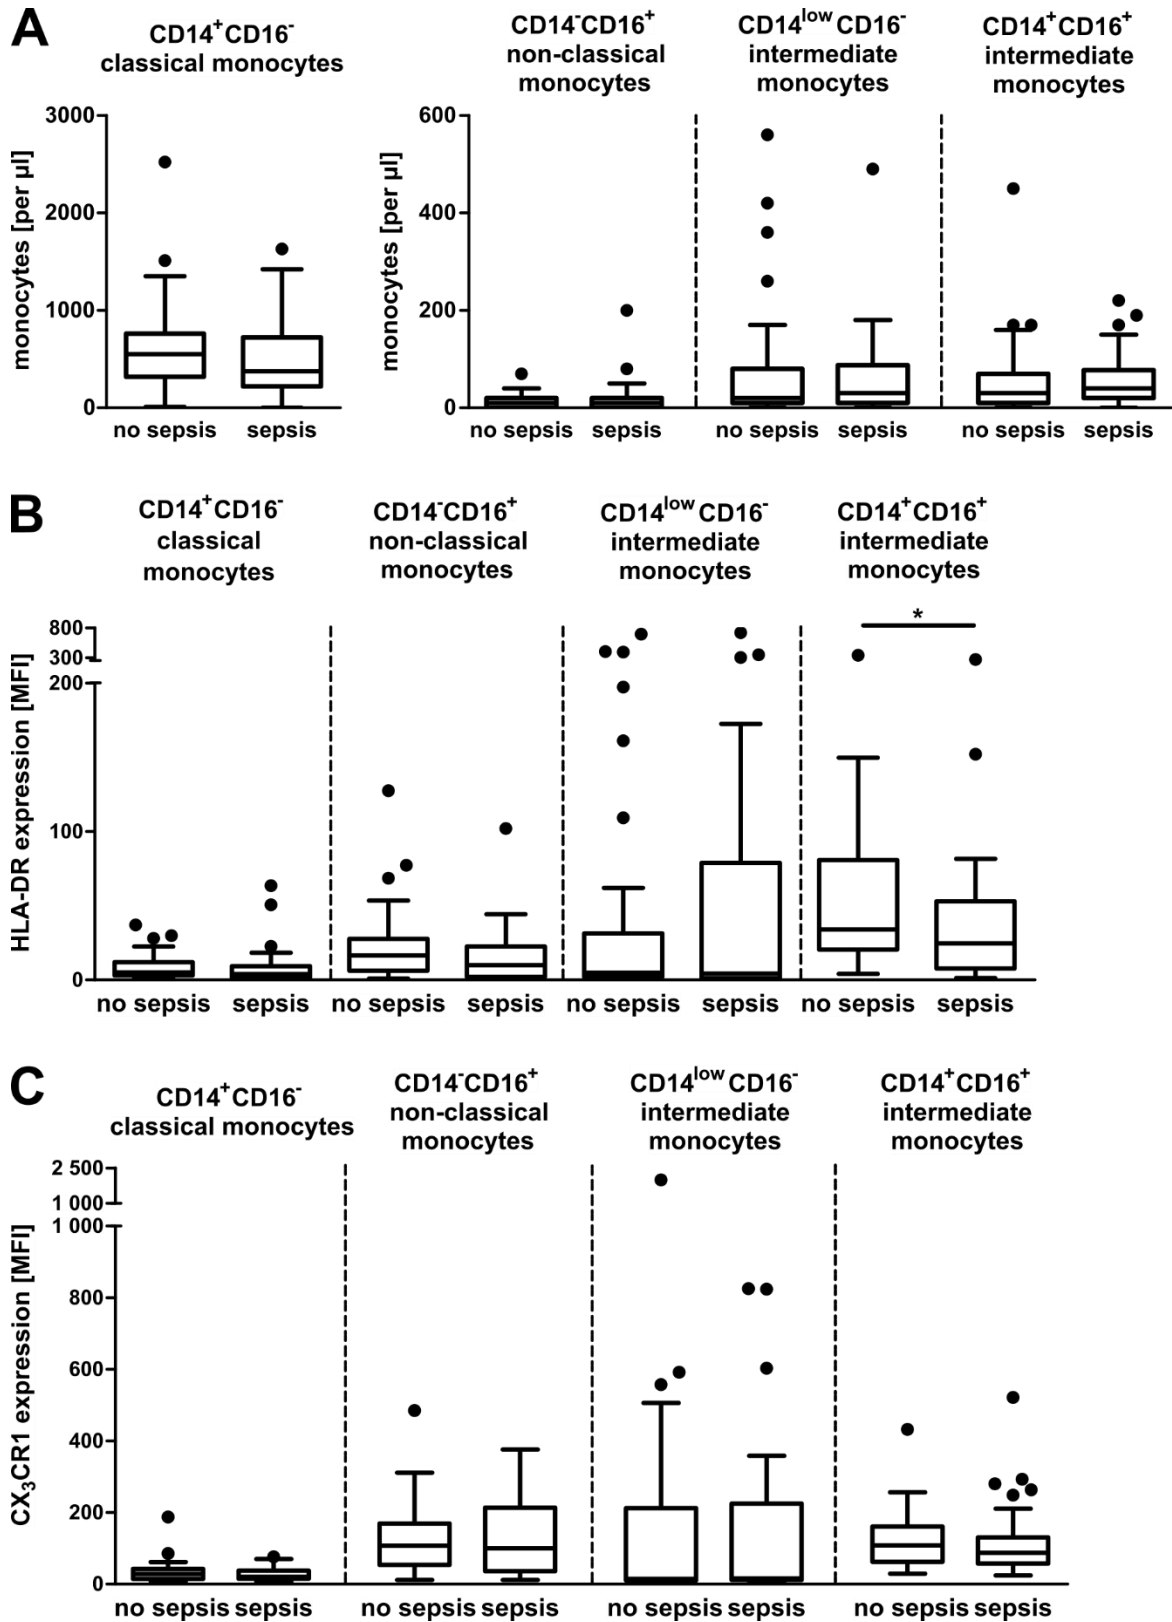

**Supplementary Figure S2.** Monocyte subsets in ICU patients with and without sepsis. (A) Absolute numbers of monocyte subpopulations from ICU patients with and without sepsis. (B) and (C) Mean fluorescence intensity (MFI) of HLA-DR (B) and CX<sub>3</sub>CR1 (C) expression of the monocyte subpopulations in ICU patients with and without sepsis (C). Statistics: \* indicates  $p < 0.05$ . For comparison of two groups, the Mann-Whitney U test was used. Sample sizes: no sepsis  $n \geq 39$ , sepsis  $n = 36$ .

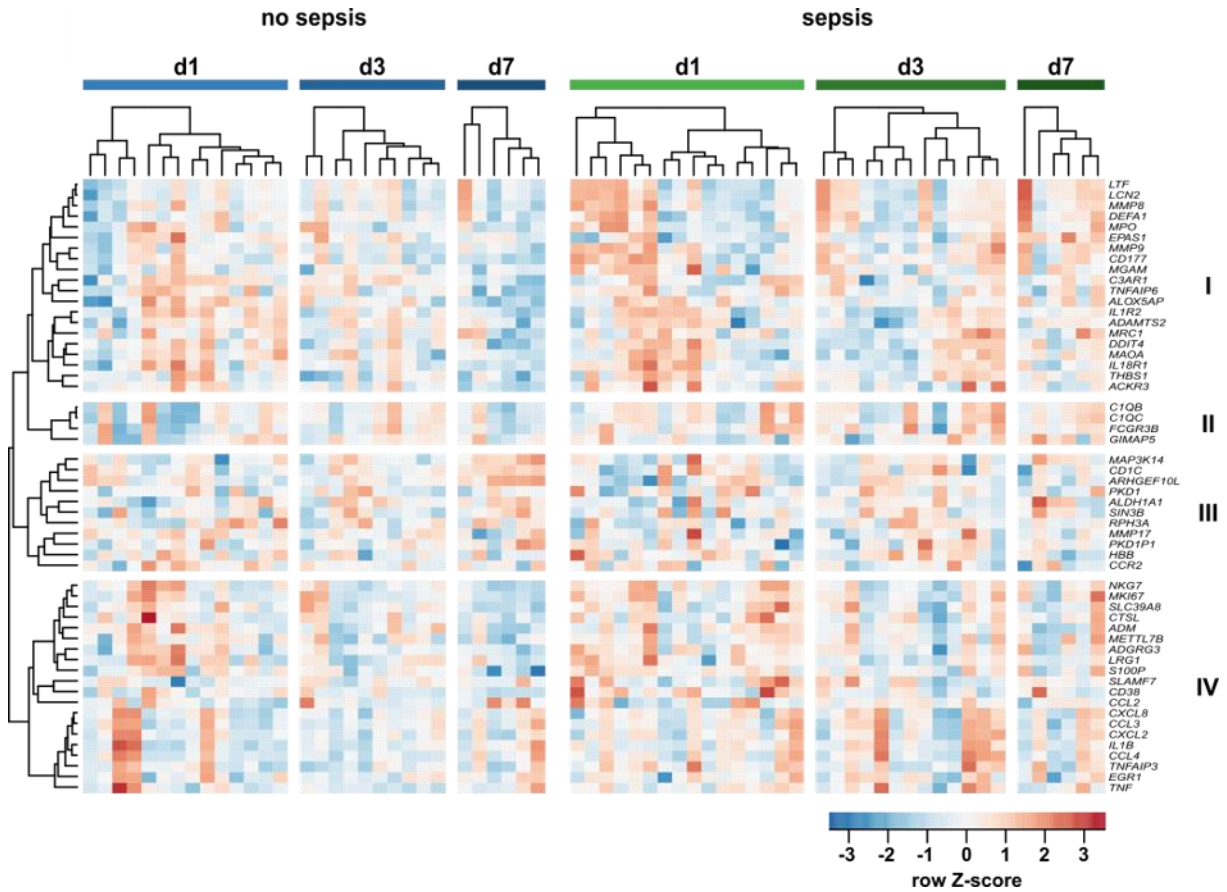

**Supplementary Figure S3.** NanoString analysis of mRNA expression in peripheral CD14<sup>+</sup> monocytes in intensive care patients with and without sepsis on day1, day 3 and day 7 of ICU stay. Clustered Heatmap of the standardized mRNA expression of genes measured by NanoString analysis. Sample clustering was separately performed for each group. Sample sizes: no sepsis: d1 = 14, d3 = 10, d7 = 6; sepsis: d1 = 16, d3 = 13, d7 = 6.

**Supplementary Table S1.** Characteristics of intensive care unit patients (ICU) with or without follow-up measurements.

| Parameter                       | No Follow-Up Measurement | Follow-Up Measurement | <i>p</i> -Value |
|---------------------------------|--------------------------|-----------------------|-----------------|
| Number, <i>n</i>                | 46                       | 30                    | -               |
| Male/female, <i>n</i>           | 28/18                    | 17/13                 | n.s.            |
| Age (years)                     | 71.5                     | 64                    | n.s.            |
| Days in hospital                | 11                       | 22                    | 0.001 **        |
| Days on ICU                     | 3                        | 12                    | <0.001 ***      |
| Death on ICU, <i>n</i> (%)      | 13 (28.3%)               | 8 (26.7%)             | n.s.            |
| Death in hospital, <i>n</i> (%) | 16 (34.8%)               | 12 (40%)              | n.s.            |
| APACHE II score                 | 22                       | 23                    | n.s.            |
| Leukocytes (per nL)             | 10.7                     | 16.1                  | 0.012 *         |
| Monocytes (per nL)              | 0.62                     | 0.62                  | n.s.            |

The median is given, unless indicated otherwise. Statistics: \* indicates  $p < 0.05$ , \*\*  $p < 0.01$ , \*\*\*  $p < 0.001$ . For comparison between two groups, Mann-Whitney U test (for continuous variables) or Pearson Chi-squared test (for nominal variables) was used. N.s.: not significant.
